# Supplementary material for: Folate Deficiency Enhanced Inflammation and Exacerbated Renal Fibrosis in High-Fat High-Fructose Diet-Fed Mice
Source: MDPI journal article supplement (doi:10.3390/nu15163616), 2023-08-17
Supplement: s1 [file s1]

Supplementary Materials

# Folate Deficiency Enhanced Inflammation and Exacerbated Renal Fibrosis in High-Fat High-Fructose Diet-Fed Mice

**Table S1.** Characteristics of eight-week-old C57BL/6 mice prior to the beginning of the experiment.

|                               | NF+f<br>(n = 11) | NF-f<br>(n = 11) | HFF+f<br>(n = 16) | HFF-f<br>(n = 16) |
|-------------------------------|------------------|------------------|-------------------|-------------------|
| Body weight (g)               | 23.3 ± 0.3       | 23.3 ± 0.3       | 23.3 ± 0.2        | 23.3 ± 0.2        |
| Fasting serum TC (mg/dL)      | 84.2 ± 3.8       | 92.8 ± 2.7       | 86.2 ± 3.9        | 88.9 ± 2.5        |
| Fasting Serum LDL-C (mg/dL)   | 22.0 ± 2.1       | 26.4 ± 1.9       | 21.5 ± 2.7        | 22.6 ± 1.4        |
| Fasting blood glucose (mg/dL) | 99.0 ± 3.4       | 105.0 ± 5.9      | 92.0 ± 3.8        | 100.0 ± 4.1       |
| Serum folate (ng/mL)          | 40.7 ± 3.5       | 39.3 ± 2.0       | 42.6 ± 3.5        | 43.0 ± 2.2        |
| Serum homocysteine (μmol/L)   | 1.11 ± 0.04      | 1.13 ± 0.05      | 1.11 ± 0.05       | 1.25 ± 0.07       |

Data are mean ± SEM (*n* = 11 or 16 per group). TC: total cholesterol; LDL-C: low-density lipoprotein cholesterol.

**Table S2.** Pearson correlation between serum cholesterol and renal functional or fibrotic indicators in mice fed NF or HFF diet for 12 months.

| NF, HFF Diet                        |                | Serum TC | Serum LDL-C |
|-------------------------------------|----------------|----------|-------------|
| Renal type IV collagen              | r value        | 0.718    | 0.632       |
|                                     | <i>p</i> value | <0.0001  | <0.0001     |
| Renal type I collagen               | r value        | 0.634    | 0.566       |
|                                     | <i>p</i> value | <0.0001  | <0.0001     |
| Glomerulus size                     | r value        | 0.688    | 0.599       |
|                                     | <i>p</i> value | <0.0001  | <0.0001     |
| Renal fibrosis area                 | r value        | 0.644    | 0.538       |
|                                     | <i>p</i> value | <0.0001  | <0.0001     |
| Serum creatinine                    | r value        | 0.588    | 0.477       |
|                                     | <i>p</i> value | <0.0001  | <0.0001     |
| Urinary protein-to-creatinine ratio | r value        | 0.466    | 0.353       |
|                                     | <i>p</i> value | <0.0001  | 0.010       |
| Urinary NGAL                        | r value        | 0.320    | 0.356       |
|                                     | <i>p</i> value | 0.018    | 0.010       |

NGAL: neutrophil gelatinase-associated lipocalin.

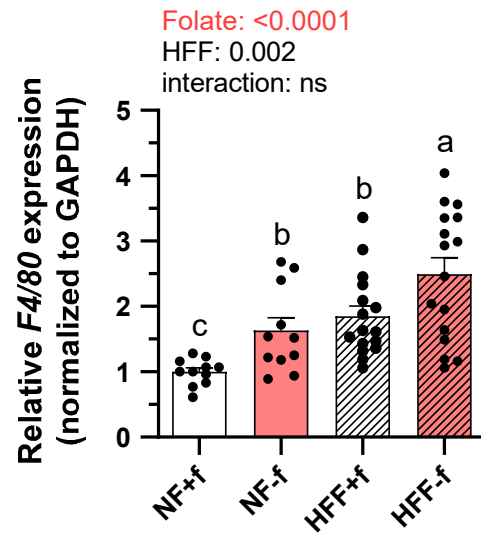

**Figure S1.** Both HFF diet and folate deficiency increased *F4/80* gene expression in the kidney. Renal *F4/80* gene levels were determined by qRT-PCR method. Data are mean  $\pm$  SEM (n = 11 or 16 per group). Values were analyzed with two-way ANOVA with folate and HFF as independent factors, followed by Duncan's post hoc test.  $p < 0.05$  or different letters was considered statistically significant. ns: not significant.
